# Supplementary material for: Citrullination mediated by PPAD constrains biofilm formation in P. gingivalis strain 381
Source: PubMed Central journal article supplement (PMC6367333; doi:10.1038/s41522-019-0081-x), 2019-02-07
Supplement: 41522_2019_81_MOESM1_ESM.pdf [file 41522_2019_81_MOESM1_ESM.pdf]

## Supplementary Table 1 Strains and plasmids used in this study

| Strain or plasmid (relevant genotype or phenotype)          | Source or reference                                    |
|-------------------------------------------------------------|--------------------------------------------------------|
| <i>P. gingivalis</i> strains                                |                                                        |
| 381 (wild type)                                             | H. Kuramitsu, State University of Buffalo, Buffalo, NY |
| $\Delta$ PGF_00008820::Erm (Em <sup>r</sup> ) in strain 381 | This study                                             |
| $\Delta$ rgpA::Erm (Em <sup>r</sup> ) in strain 381         | This study                                             |
| $\Delta$ kgp::Erm (Em <sup>r</sup> ) in strain 381          | This study                                             |
| <i>E. coli</i> strains                                      |                                                        |
| NEB 5 $\alpha$                                              | NEB                                                    |
| BL21(DE3)                                                   | NEB                                                    |
| Plasmids                                                    |                                                        |
| pT-COW (Cb <sup>r</sup> Tc <sup>r</sup> )                   | 45                                                     |
| pT-C8820 (Cb <sup>r</sup> Tc <sup>r</sup> )                 | This study                                             |
| pET-22b (Am <sup>r</sup> )                                  | Novagen                                                |
| pET22b-Hgp27 (Am <sup>r</sup> )                             | This study                                             |
| pET22b-Kgp39 (Am <sup>r</sup> )                             | This study                                             |
| pTgroES-HU (Cb <sup>r</sup> Tc <sup>r</sup> )               | 46                                                     |



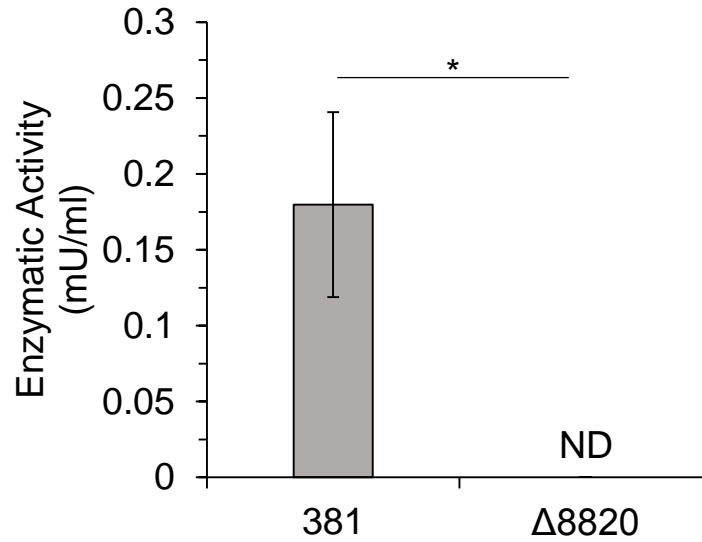

**Supplementary Figure 1** Deletion of PGF\_00008820 depletes peptidylarginine deiminase enzymatic activity. 381 and Δ8820 were grown to stationary phase and 10 μl aliquots were used to test enzymatic activity of PPAD. Data represent the average of three independent experiments (n=9). Error bars represent the standard deviation. The data were analyzed using the Student's two-tailed t-test. \* $p < 0.05$ . ND, none detected.

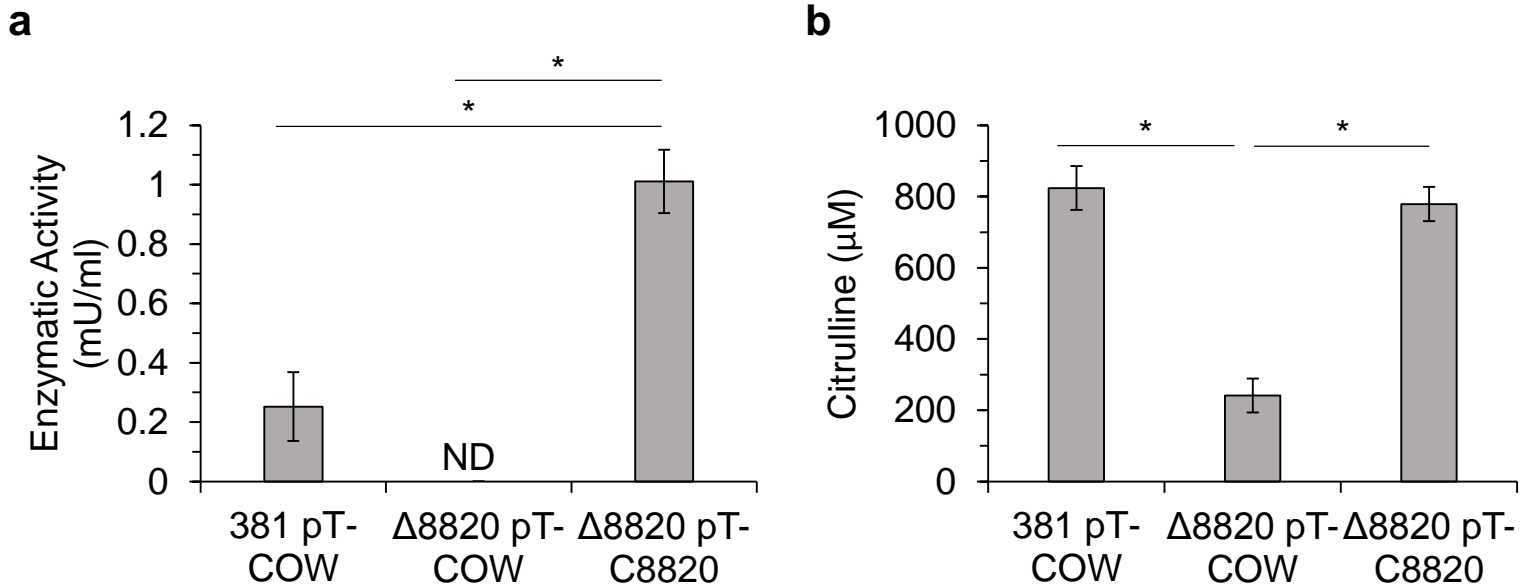

**Supplementary Figure 2** Complementation restores PPAD enzymatic activity. All strains were grown to stationary phase and 10  $\mu$ l aliquots were used to test (a) enzymatic activity of PPAD or (b) the concentration of citrulline in cultures. Complementation of  $\Delta$ 8820 restored PPAD enzymatic activity. Although the enzymatic activity of  $\Delta$ 8820 pT-C8820 was greater than 381 pT-COW, the concentration of citrulline in stationary cultures was the same. Data represent the average of three independent experiments (n=9). Error bars represent the standard deviation. Data represent the average of three independent experiments. Error bars represent the standard deviation. The data were analyzed by ANOVA with Bonferroni post tests. \* $p$ <0.05. ND, none detected.

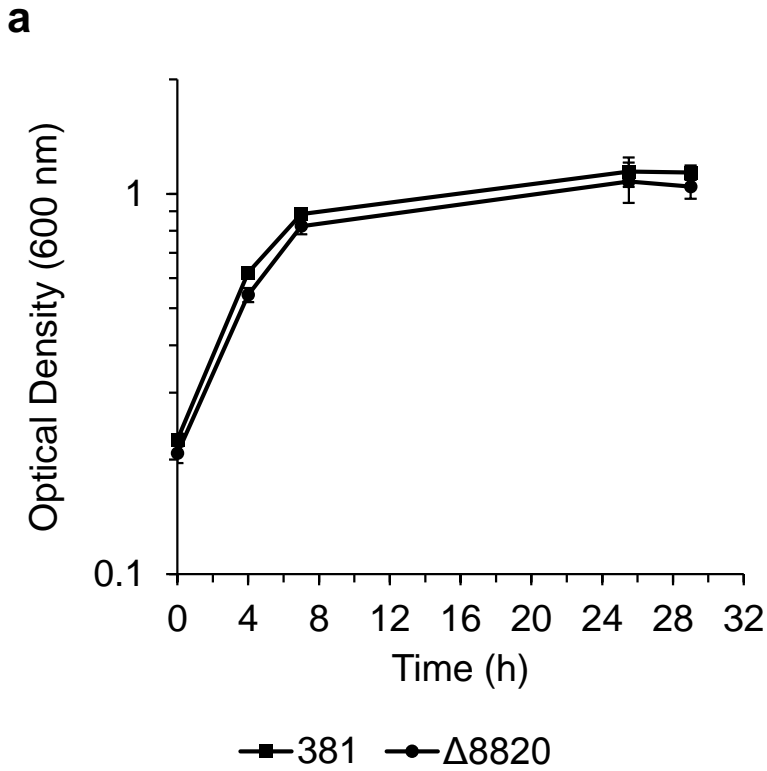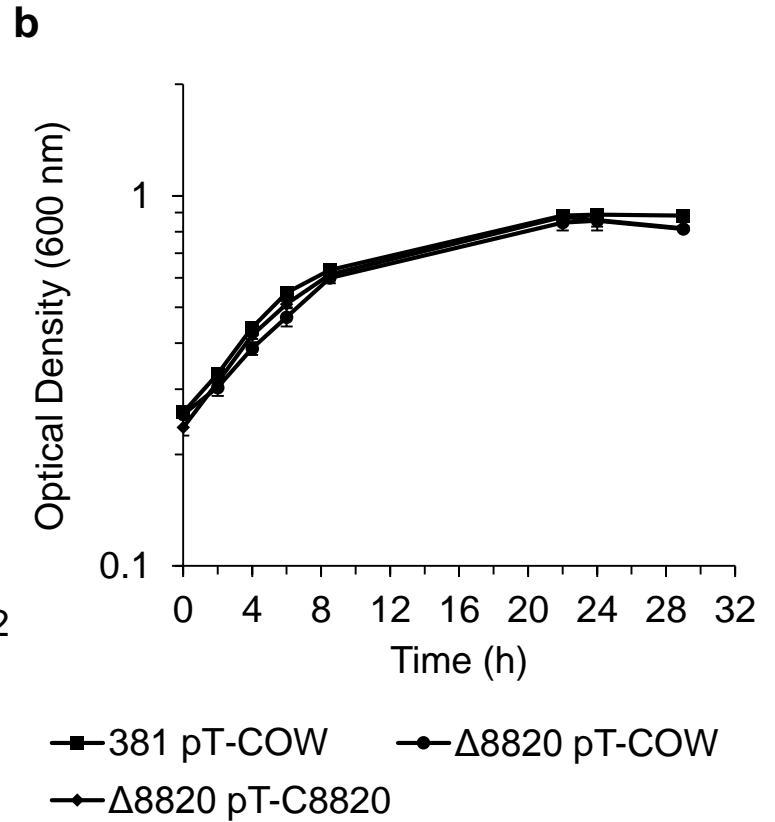

**Supplementary Figure 3** (a) Growth curves of 381 and  $\Delta 8820$  grown in chemically defined media supplemented with 1% tryptone (CDM-T). (b) Growth curves of 381 and  $\Delta 8820$  containing pT-COW (empty vector controls) and complemented  $\Delta 8820$  (pT-C8820) grown in CDM-T in the presence of tetracycline. Data represent the average of three biological replicates ( $n=3$ ). Error bars represent the standard deviation.

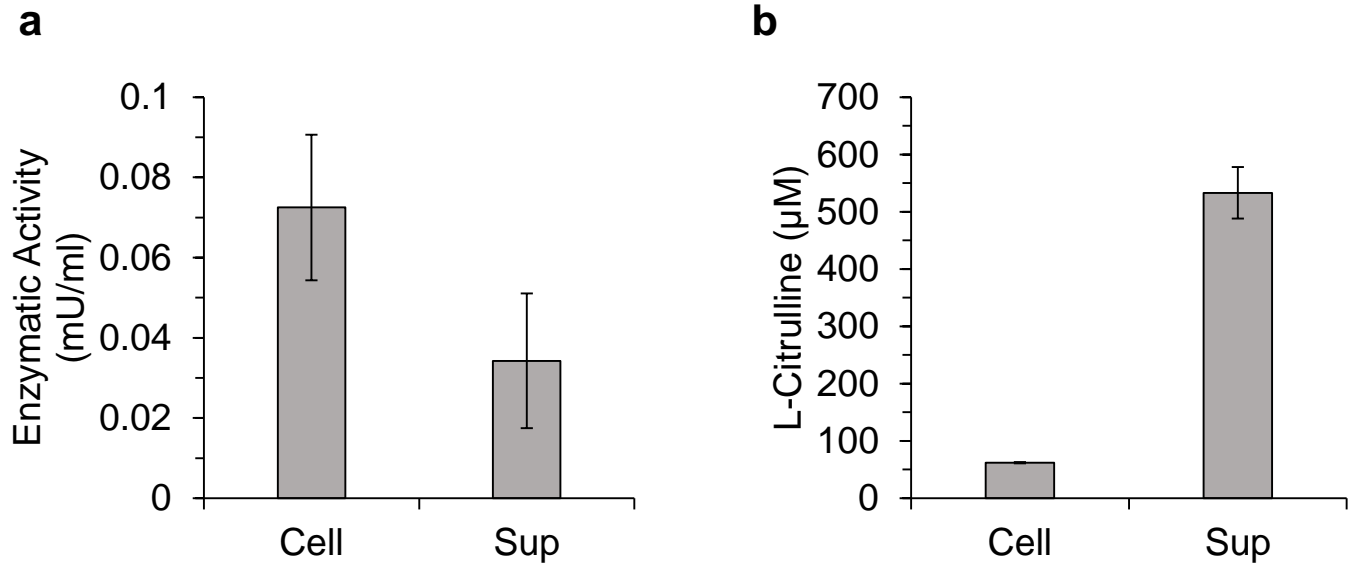

**Supplementary Figure 4** The majority of PPAD enzymatic activity is cell-associated, while the majority of citrulline is found in the supernatant. (a) PPAD enzymatic activity and (b) the concentration of citrulline present on cells and in the supernatant was measured using a colorimetric assay and an L-citrulline standard curve. Data in (a) and (b) are averages of three independent experiments (n=9). Error bars represent the standard deviation.

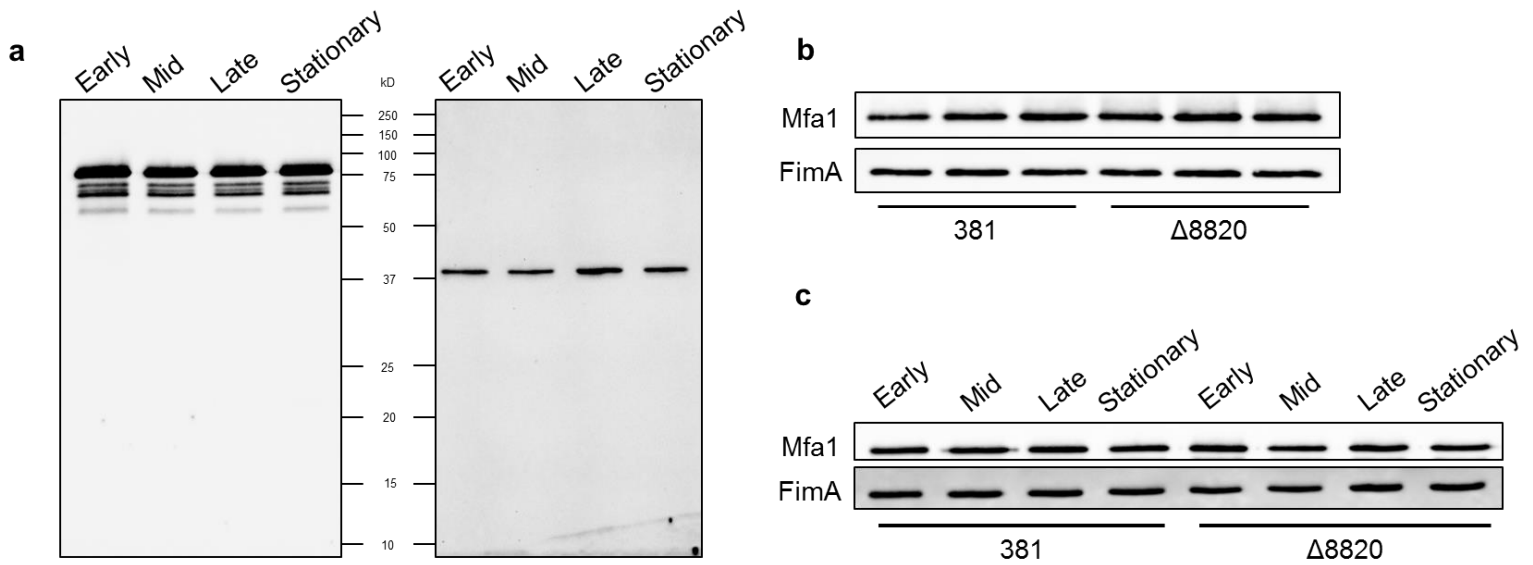

**Supplementary Figure 5** Deletion of PPAD does not affect fimbriae protein expression. **(a)**

Specificity of (left) anti-Mfa1 and (right) anti-FimA antibodies was tested against 381 planktonic cell samples. Anti-Mfa1 primarily hybridizes to a band at 75 kD, but occasionally binds to proteins below 75 kD and above 50 kD, especially with increasing exposure time. Anti-FimA specifically binds a protein at 40 kD. Major (FimA) and minor (Mfa1) fimbriae present in **(b)** 24 h biofilm lysates and **(c)** planktonic cell samples were analyzed by western blot. Samples derive from the same experiment and the blots were processed in parallel.

### **Rgp27**

KVFLAADNVWGDNTGYQFLLDADHNTFGSVIPATGPLFTGTASSNLYSANFEYLIPANADPV  
VTTQNIIVTGQGEVVIPGGVYDYCITNPEPASGKMWIAGDGGNQPARYDDFTFEAGKKYTF  
TMRRAGMGDGTMEVEDDSPASYTYTVYRDGTKIKEGLTETTYRDAGMSAQSHEYCVEV  
KYAAGVSPKVCVDYIPDGVADVTAQKPYTLTVVGKTITVTCQGEAMIYDMNGRRRLAAGRNT  
VVYTAQGGYYAVMVVVDGKSYVEKLAVK

### **Kgp39**

KKAEASREVKRIGDGLFVTIEPANDVRANEAKVFLAADNVWGDNTGYQFLLDADHNTFGS  
VIPATGPLFTGTASSNLYSANFEYLIPANADPVTTQNIIVTGQGEVVIPGGVYDYCITNPEPA  
SGKMWIAGDGGNQPARYDDFTFEAGKKYTFTMRRAGMGDGTMEVEDDSPASYTYTVY  
RDGTKIQEGLTATTFEEDGVAAGNHEYCVEVKYTAGVSPKVCKDVTVEGSNEFAPVQNLTG  
SAVGQKVTLKWDAPNGTPNPNPNPNPGTTTTLSESFENGIPASWKTIDADGDGHGWKPGN  
APGIAGYNSNGCVYSESFGLGGIGVLTPDNYLITPALDLPNGGKLTFWVCAQDANYASEHY  
AVYASSTGNDASNFTNALLEETITAK

**Supplementary Figure 6** Gingipain-derived adhesin proteins are predicted to be

citruillinated based on mass spectrometry. Shown are the sequences of Rgp27 and Kgp39

with all arginine residues indicated in bold and the arginine residues predicted to be

citruillinated indicated in red and underlined.



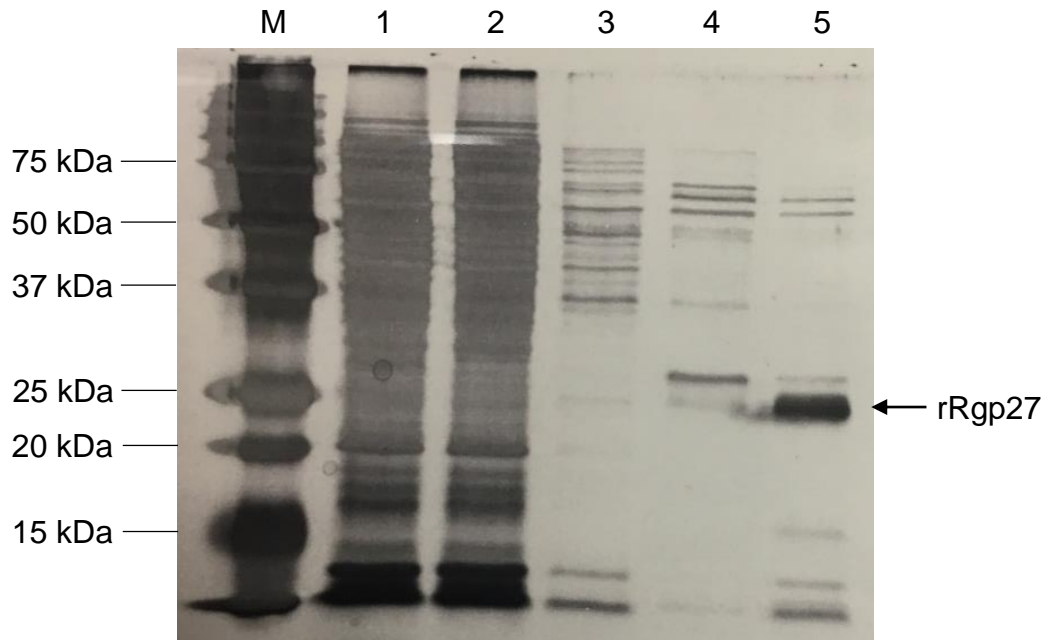

**Supplementary Figure 7** Silver stain of purified recombinant adhesin domain Rgp27.

Purified samples and upstream fractions were run on SDS PAGE gels and stained by silver stain to assess purity of the protein. M: Precision Plus Protein Dual Color standards, 1: BL21(DE3) pET22b-Rgp27 lysate pre Ni-NTA, 2: BL21(DE3) pET22b-Rgp27 lysate post Ni-NTA, 3: Wash, 4: Purified eluent, 5: Purified rRgp27

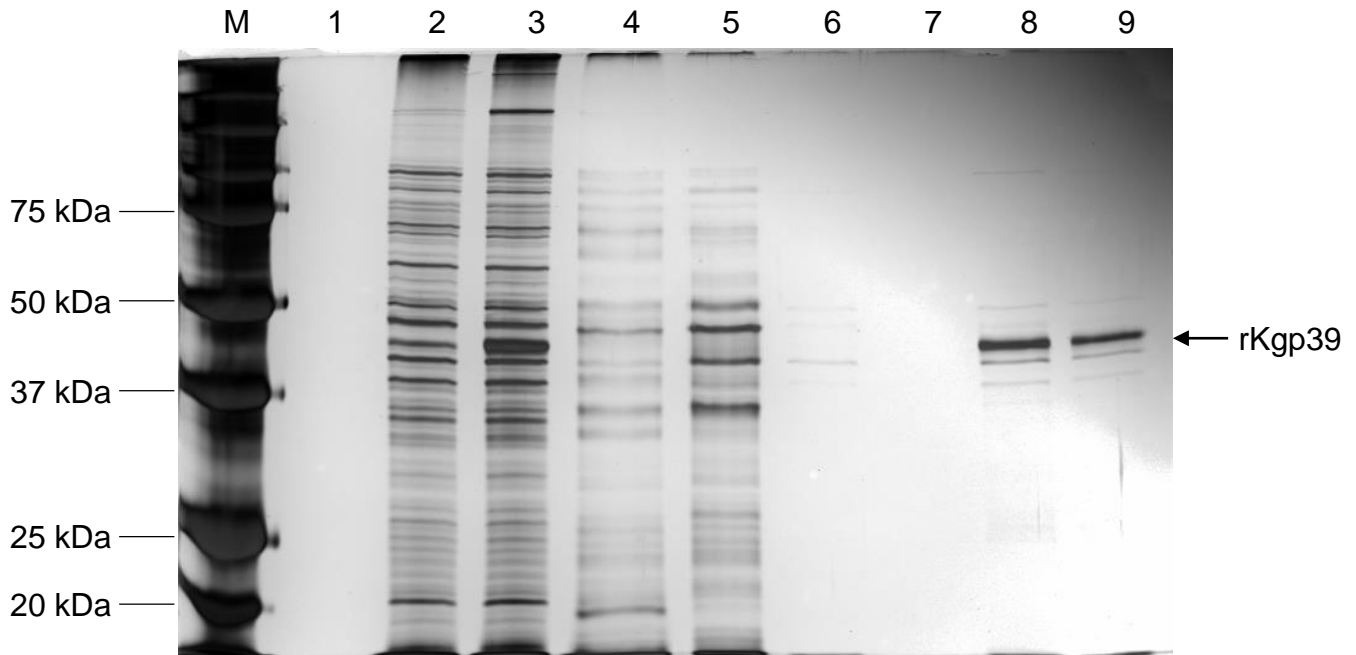

**Supplementary Figure 8** Silver stain of purified recombinant adhesin domain Kgp39.

Purified samples and upstream fractions were run on SDS PAGE gels and stained by silver stain to assess purity of the protein. M: Precision Plus Protein Dual Color standards, 1: N/A, 2: BL21(DE3) pET22b-Kgp39 pre-induction, 3: BL21(DE3) pET22b-Kgp39 post 4 h induction with 1 mM IPTG, 4: Denaturing Binding Buffer, 5: Denaturing Wash Buffer (first wash), 6: Native Wash Buffer (first wash), 7: Native Wash Buffer (fourth wash), 8: Purified rKgp39 (first elution), 9: Purified rKgp39 (second elution)

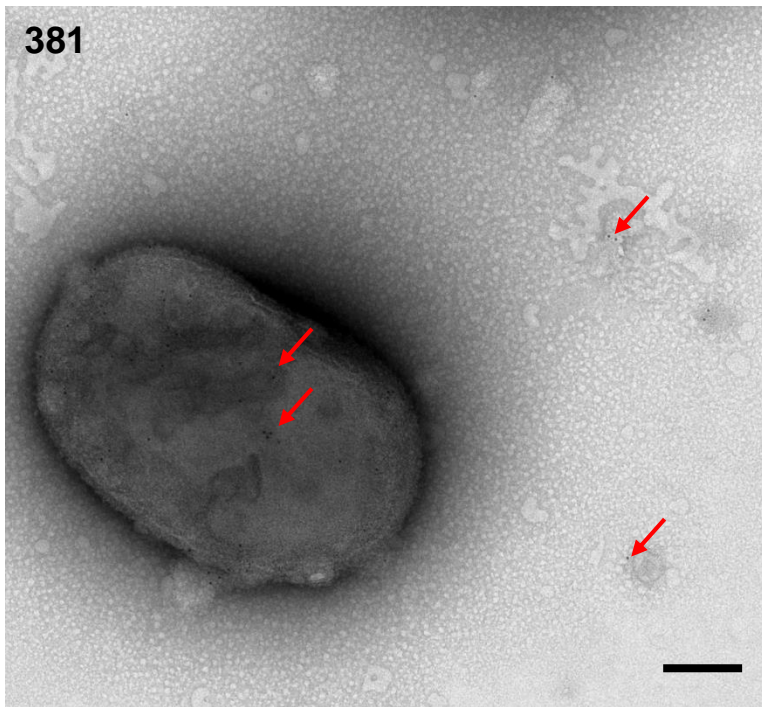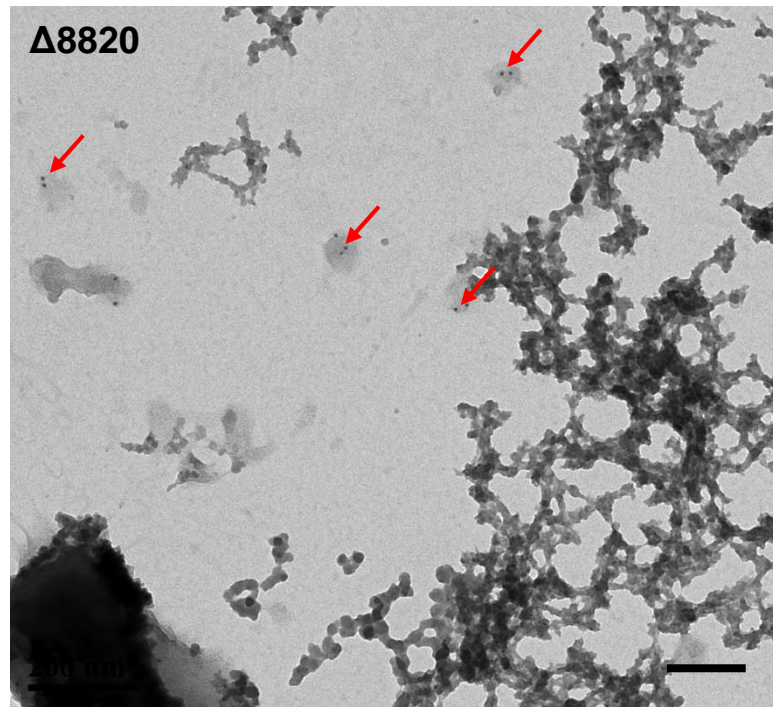

**Supplementary Figure 9** Gingipain-derived adhesin proteins localize to the cell surface and OMV-like structures. Suspended 381 and  $\Delta 8820$  colony biofilms grown on plates were negatively stained with 0.5% aqueous uranyl acetate, treated with the anti-adhesin primary antibody, and then images were acquired by immunogold labeling and TEM. Arrows indicate representative colloidal gold particles. Scale bar: 200 nm

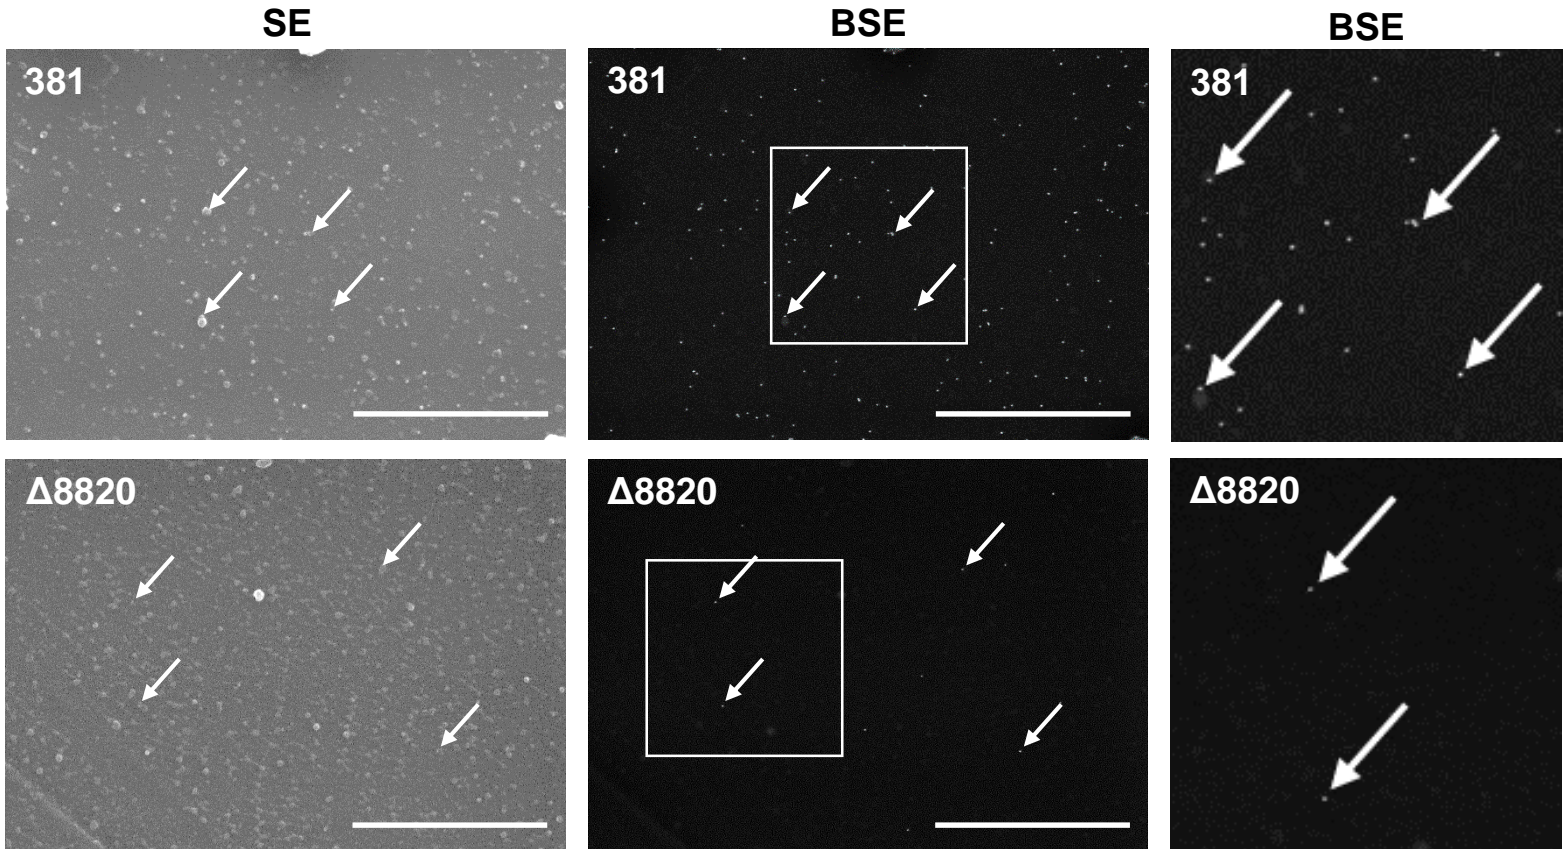

**Supplementary Figure 10** OMV-associated gingipain-derived adhesin proteins were more often observed in 381 samples than  $\Delta 8820$  samples. Suspended 381 and  $\Delta 8820$  colony biofilms were fixed and treated with the anti-adhesin primary antibody. Images were acquired by immunogold labeling and SEM. Arrows indicate representative colloidal gold particles. SE: Secondary electron, BSE: Backscatter electron, Scale bar: 2  $\mu\text{m}$
